# Supplementary material for: 2-aminoimidazoles collapse mycobacterial proton motive force and block the electron transport chain
Source: PubMed Central journal article supplement (PMC6365497; doi:10.1038/s41598-018-38064-7), 2019-02-06
Supplement: 41598_2018_38064_MOESM1_ESM.pdf [file 41598_2018_38064_MOESM1_ESM.pdf]

## **2-aminoimidazoles collapse mycobacterial proton motive force and block the electron transport chain**

Albert Byungyun Jeon<sup>1,a</sup>, David F. Ackart<sup>1</sup>, Wei Li<sup>1</sup>, Mary Jackson<sup>1</sup>, Roberta J. Melander<sup>2,b</sup>, Christian Melander<sup>2,b</sup>, Robert B. Abramovitch<sup>3</sup>, Adam J. Chicco<sup>4</sup>, Randall J. Basaraba<sup>1,\*</sup>, Andrés Obregón-Henao<sup>1,\*</sup>

**Figure S1.**

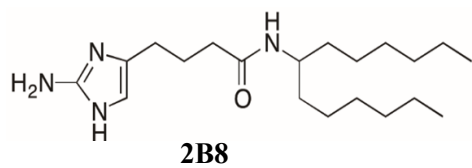

**Active**

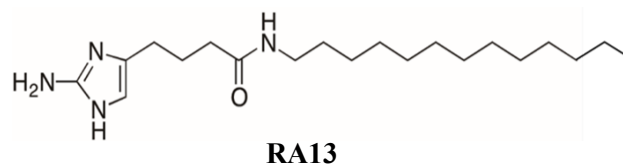

**Inactive**

**Figure S1. Structures of 2-AI compounds.**

Figure S2.

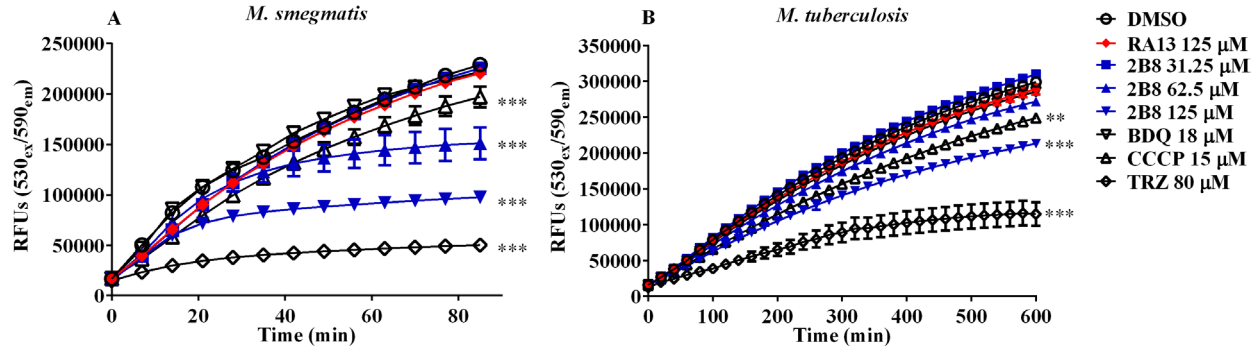

**Figure S2. 2B8 inhibits alamarBlue<sup>®</sup> reduction by mycobacteria.** *M. smegmatis* and *M. tuberculosis* were treated with 2-AI compounds or drugs targeting mycobacterial bioenergetics, while being monitored for alamarBlue<sup>®</sup> reduction immediately following treatment. A) After 80 min, 62.5 and 125 μM 2B8, 15 μM CCCP, and 80 μM TRZ inhibited alamarblue<sup>®</sup> reduction by *M. smegmatis*. B) AlamarBlue<sup>®</sup> reduction by *M. tuberculosis* was inhibited with 15 μM CCCP, 80 μM TRZ and 125 μM 2B8 (but not 62.5 μM). For both *M. smegmatis* and *M. tuberculosis*, incubation with 125 μM RA13 and 18 μM BDQ did not have an effect. Experiments were repeated three separate times and representative data are shown. \* p < 0.05, \*\* p < 0.01, \*\*\* p < 0.001 by ANOVA.

**Table S1. MICs of 2-AI compounds against *M. smegmatis* and *M. tuberculosis* in the presence or absence of albumin.**

|      | <i>M. tuberculosis</i> H37Rv mc <sup>2</sup> 6206 |        | <i>M. smegmatis</i> |        |
|------|---------------------------------------------------|--------|---------------------|--------|
|      | +0.5% BSA                                         | No BSA | +0.5% BSA           | No BSA |
| 2B8  | 250-500                                           | 250    | 125-250             | 62.5   |
| RA13 | > 1000                                            | > 1000 | > 1000              | > 1000 |

All MIC values are  $\mu\text{M}$ .

**Table S2: Summary of bioenergetics effects induced by tested compounds.**

| Read-out                              | 2B8                                      | RA13       | CCCP                            | BDQ                                   | TRZ                            | KCN                                  |
|---------------------------------------|------------------------------------------|------------|---------------------------------|---------------------------------------|--------------------------------|--------------------------------------|
| <b>Mechanism of action</b>            | Uncoupler &<br>ETC block at unknown site | Negligible | Uncoupler &<br>Proton ionophore | ATP synthase Inhibitor &<br>Uncoupler | NDH-2 inhibitor &<br>Uncoupler | ETC block at<br>cytochrome c oxidase |
| <b>alamarBlue® reduction</b>          | Strong ↓                                 | No effect  | Weak ↓                          | No effect                             | Strong ↓                       | N/T                                  |
| <b>Δψ collapse</b>                    | Strong                                   | No effect  | Strong                          | No effect                             | Intermediate                   | N/T                                  |
| <b>ΔpH collapse</b>                   | Strong                                   | Weak       | Intermediate                    | Intermediate                          | Strong                         | N/T                                  |
| <b>O<sub>2</sub> consumption rate</b> | ↑ then ↓                                 | Weak ↑     | ↑ then ↓                        | ↑                                     | ↑                              | N/T                                  |
| <b>[ATP]<sub>i</sub></b>              | Strong ↓                                 | No effect  | Intermediate ↓                  | Strong ↓                              | Strong ↓                       | N/T                                  |
| <b>ETC activity</b>                   | Strong ↓                                 | Weak ↓     | Weak ↑                          | No effect                             | Strong ↓                       | No effect                            |
| <b>NADH/NAD<sup>+</sup> ratio</b>     | Strong ↑                                 | No effect  | No effect                       | Intermediate ↑                        | Strong ↑                       | N/T                                  |
| <b>NADH oxidation</b>                 | Strong ↓                                 | No effect  | Weak ↑                          | Intermediate ↓                        | Strong ↓                       | Strong ↓                             |
| <b>Rescue by CFZ</b>                  | Partial                                  | N/T        | No effect                       | N/T                                   | No                             | Yes                                  |
| <b>β-lactam potentiation</b>          | Strong ↑                                 | Marginal ↑ | Intermediate ↑                  | Weak ↑                                | Intermediate ↑                 | N/T                                  |

↓= Inhibition

↑= Induction

N/T= Not tested

**Table S3. Comparison of the effects induced by a low or high concentration of 2B8.**

| <b>Proposed action</b>                         | Low ( $\leq 62.5 \mu\text{M}$ ) | High ( $> 62.5 \mu\text{M}$ ) |
|------------------------------------------------|---------------------------------|-------------------------------|
|                                                | Uncoupler                       | ETC blocker                   |
| <b>Acute (<math>\leq 2 \text{ h}</math>)</b>   |                                 |                               |
| <b><math>\Delta\psi</math> collapse</b>        | Strong                          | Strong                        |
| <b><math>\Delta\text{pH}</math> collapse</b>   | Low-Strong                      | Strong                        |
| <b>O<sub>2</sub> consumption rate</b>          | ↑                               | ↓ to basal                    |
| <b>ETC activity</b>                            | No effect                       | ↓                             |
| <b>NADH oxidation</b>                          | No effect                       | ↓                             |
| <b>[ATP]<sub>i</sub></b>                       | No effect                       | No effect                     |
| <b>NADH/NAD<sup>+</sup> ratio</b>              | No effect-↑                     | ↑                             |
| <b>Delayed (<math>&gt; 2 \text{ h}</math>)</b> |                                 |                               |
| <b>alamarBlue® reduction</b>                   | No effect                       | ↓                             |
| <b>[ATP]<sub>i</sub></b>                       | No effect-↓                     | ↓                             |
| <b>NADH/NAD<sup>+</sup> ratio</b>              | No effect-↑                     | ↑                             |

↓= Inhibition

↑= Induction
